# Supplementary material
Source: publisher figshare collection journal article supplement (https://acs.figshare.com/ndownloader/files/4493383)
Supplement: Supplementary file 1 [file 4493383]

#  AUTHOR AND PROPOSED JOURNAL DETAILS 


_publ_contact_author 'Dr Zhiping Zheng' 
_publ_contact_author_email zhiping@email.arizona.edu 
_publ_contact_author_fax '+1 520 626 6495' 
_publ_contact_author_phone '+1 520 626 6495' 


# Authors' names and addresses 
loop_ 
_publ_author_name 
_publ_author_address 


'Xiaoyan Tu' 
; 
Department of Chemistry 
The University of Arizona 
1306 E University Boulevard 
Tucson, AZ 85721 
United States of America 
; 


'Ethan Boroson' 
; 
Catalina Foothills High School
Tucson, Arizona 85718
United States of America 
; 


'Huong Truong' 
; 
Department of Chemistry 
The University of Arizona 
1306 E University Boulevard 
Tucson, AZ 85721 
United States of America 
;

'Alvaro Mu\~noz-Castro' 
; 
Departamento de Ciencias Qu\'imicas
Facultad de Recursos Naturales
Universidad Andr\'es Bello
Rep\'ublica 275, Santiago, Chile 
;

'Ramiro Arratia-P\'erez' 
; 
Departamento de Ciencias Qu\'imicas
Facultad de Recursos Naturales
Universidad Andr\'es Bello
Rep\'ublica 275, Santiago, Chile
;

'Gary, S. Nichol' 
; 
Department of Chemistry 
The University of Arizona 
1306 E University Boulevard 
Tucson, AZ 85721 
United States of America 
; 


'Zhiping Zheng' 
; 
Department of Chemistry 
The University of Arizona 
1306 E University Boulevard 
Tucson, AZ 85721 
United States of America 
; 


# Name of the journal to which the paper has been or will be submitted 
# WILL BE SUBMITTED 


_publ_requested_journal 'Inorganic Chemistry' 
_journal_name_full 'Inorganic Chemistry'


data_Complex3
# LOCAL NAME zz285b

_audit_creation_method            SHELXL-97
_chemical_name_systematic
;
 ?
;
_chemical_name_common             ?
_chemical_melting_point           ?
_chemical_formula_moiety  'C38 H84 N P5 Re6 Se8 2+, 2 C24 H20 B -, C7 H8'
_chemical_formula_sum
 'C93 H132 B2 N P5 Re6 Se8'
_chemical_formula_weight          3189.35

loop_
 _atom_type_symbol
 _atom_type_description
 _atom_type_scat_dispersion_real
 _atom_type_scat_dispersion_imag
 _atom_type_scat_source
 'C'  'C'   0.0033   0.0016
 'International Tables Vol C Tables 4.2.6.8 and 6.1.1.4'
 'H'  'H'   0.0000   0.0000
 'International Tables Vol C Tables 4.2.6.8 and 6.1.1.4'
 'B'  'B'   0.0013   0.0007
 'International Tables Vol C Tables 4.2.6.8 and 6.1.1.4'
 'N'  'N'   0.0061   0.0033
 'International Tables Vol C Tables 4.2.6.8 and 6.1.1.4'
 'P'  'P'   0.1023   0.0942
 'International Tables Vol C Tables 4.2.6.8 and 6.1.1.4'
 'Se'  'Se'  -0.0929   2.2259
 'International Tables Vol C Tables 4.2.6.8 and 6.1.1.4'
 'Re'  'Re'  -1.0185   7.2310
 'International Tables Vol C Tables 4.2.6.8 and 6.1.1.4'

_symmetry_cell_setting            triclinic
_symmetry_space_group_name_H-M    'P -1'

loop_
 _symmetry_equiv_pos_as_xyz
 'x, y, z'
 '-x, -y, -z'

_cell_length_a                    16.870(2)
_cell_length_b                    17.192(2)
_cell_length_c                    17.913(2)
_cell_angle_alpha                 96.744(2)
_cell_angle_beta                  92.112(2)
_cell_angle_gamma                 91.052(2)
_cell_volume                      5154.6(12)
_cell_formula_units_Z             2
_cell_measurement_temperature     120(2)
_cell_measurement_reflns_used     5201
_cell_measurement_theta_min       2.79
_cell_measurement_theta_max       25.62

_exptl_crystal_description        prism
_exptl_crystal_colour             orange
_exptl_crystal_size_max           0.16
_exptl_crystal_size_mid           0.10
_exptl_crystal_size_min           0.05
_exptl_crystal_density_meas       ?
_exptl_crystal_density_diffrn     2.056
_exptl_crystal_density_method     'not measured'
_exptl_crystal_F_000              3010
_exptl_absorpt_coefficient_mu     9.961
_exptl_absorpt_correction_type    numerical
_exptl_absorpt_correction_T_min   0.2986
_exptl_absorpt_correction_T_max   0.6203
_exptl_absorpt_process_details    ?

_exptl_special_details
;
 ?
;

_diffrn_ambient_temperature       120(2)
_diffrn_radiation_wavelength      0.71073
_diffrn_radiation_type            MoK\a
_diffrn_radiation_source          'fine-focus sealed tube with Miracol optics'
_diffrn_radiation_monochromator   graphite
_diffrn_measurement_device_type   'Bruker Kappa APEXII DUO CCD diffractometer'
_diffrn_measurement_method        '\f and \w scans'
_diffrn_detector_area_resol_mean  ?
_diffrn_reflns_number             35633
_diffrn_reflns_av_R_equivalents   0.0464
_diffrn_reflns_av_sigmaI/netI     0.0845
_diffrn_reflns_limit_h_min        -20
_diffrn_reflns_limit_h_max        20
_diffrn_reflns_limit_k_min        -20
_diffrn_reflns_limit_k_max        20
_diffrn_reflns_limit_l_min        -19
_diffrn_reflns_limit_l_max        21
_diffrn_reflns_theta_min          2.29
_diffrn_reflns_theta_max          25.72
_reflns_number_total              19336
_reflns_number_gt                 9183
_reflns_threshold_expression      I>2\s(I)

_computing_data_collection        'APEX2 (Bruker, 2007)'
_computing_cell_refinement        'SAINT (Bruker, 2007)'
_computing_data_reduction         SAINT
_computing_structure_solution     'SHELXTL (Sheldrick, 2008)'
_computing_structure_refinement   SHELXTL
_computing_molecular_graphics     SHELXTL
_computing_publication_material   'SHELXTL and local programs'

_refine_special_details
;
 Refinement of F^2^ against ALL reflections.  The weighted R-factor wR and
 goodness of fit S are based on F^2^, conventional R-factors R are based
 on F, with F set to zero for negative F^2^. The threshold expression of
 F^2^ > 2sigma(F^2^) is used only for calculating R-factors(gt) etc. and is
 not relevant to the choice of reflections for refinement.  R-factors based
 on F^2^ are statistically about twice as large as those based on F, and R-
 factors based on ALL data will be even larger.
;

_refine_ls_structure_factor_coef  Fsqd
_refine_ls_matrix_type            full
_refine_ls_weighting_scheme       calc
_refine_ls_weighting_details
 'calc w=1/[\s^2^(Fo^2^)+(0.1084P)^2^+132.3695P] where P=(Fo^2^+2Fc^2^)/3'
_atom_sites_solution_primary      direct
_atom_sites_solution_secondary    difmap
_atom_sites_solution_hydrogens    geom
_refine_ls_hydrogen_treatment     constr
_refine_ls_extinction_method      none
_refine_ls_extinction_coef        ?
_refine_ls_number_reflns          19336
_refine_ls_number_parameters      1020
_refine_ls_number_restraints      609
_refine_ls_R_factor_all           0.1610
_refine_ls_R_factor_gt            0.0812
_refine_ls_wR_factor_ref          0.2572
_refine_ls_wR_factor_gt           0.2080
_refine_ls_goodness_of_fit_ref    1.034
_refine_ls_restrained_S_all       1.020
_refine_ls_shift/su_max           0.002
_refine_ls_shift/su_mean          0.000

loop_
 _atom_site_label
 _atom_site_type_symbol
 _atom_site_fract_x
 _atom_site_fract_y
 _atom_site_fract_z
 _atom_site_U_iso_or_equiv
 _atom_site_adp_type
 _atom_site_occupancy
 _atom_site_symmetry_multiplicity
 _atom_site_calc_flag
 _atom_site_refinement_flags
 _atom_site_disorder_assembly
 _atom_site_disorder_group
Re1 Re 0.63968(5) 0.24944(5) 0.28127(5) 0.0316(2) Uani 1 1 d . . .
Re2 Re 0.72236(5) 0.26924(5) 0.16156(5) 0.0326(2) Uani 1 1 d . . .
Re3 Re 0.74756(5) 0.14721(5) 0.23445(5) 0.0341(2) Uani 1 1 d . . .
Re4 Re 0.77311(5) 0.24049(5) 0.35999(5) 0.0328(2) Uani 1 1 d . . .
Re5 Re 0.74724(5) 0.36305(5) 0.28753(5) 0.0361(2) Uani 1 1 d . . .
Re6 Re 0.85550(5) 0.26159(6) 0.24182(6) 0.0415(3) Uani 1 1 d D . .
Se1 Se 0.82660(14) 0.17171(14) 0.12217(14) 0.0467(6) Uani 1 1 d . . .
Se2 Se 0.82508(13) 0.37849(14) 0.17374(14) 0.0437(6) Uani 1 1 d . . .
Se3 Se 0.87359(14) 0.35090(14) 0.36364(15) 0.0491(6) Uani 1 1 d . . .
Se4 Se 0.67090(14) 0.33981(13) 0.40100(14) 0.0417(6) Uani 1 1 d . . .
Se5 Se 0.66907(12) 0.13295(12) 0.34922(13) 0.0347(5) Uani 1 1 d . . .
Se6 Se 0.87491(12) 0.14459(13) 0.31267(14) 0.0403(6) Uani 1 1 d . . .
Se7 Se 0.62012(12) 0.16076(12) 0.16022(13) 0.0361(5) Uani 1 1 d . . .
Se8 Se 0.62008(12) 0.36576(11) 0.20970(12) 0.0317(5) Uani 1 1 d . . .
P1 P 0.4974(4) 0.2460(5) 0.3111(5) 0.061(2) Uani 1 1 d . . .
P2 P 0.6913(3) 0.2930(3) 0.0298(4) 0.0377(14) Uani 1 1 d . . .
P3 P 0.7494(4) 0.0037(4) 0.2001(4) 0.0510(17) Uani 1 1 d . . .
P4 P 0.8038(3) 0.2150(3) 0.4902(3) 0.0366(13) Uani 1 1 d . . .
P5 P 0.7401(4) 0.5067(4) 0.3209(4) 0.0542(18) Uani 1 1 d . . .
C1 C 0.4370(14) 0.2376(18) 0.2305(14) 0.061(7) Uani 1 1 d U . .
H1A H 0.4523 0.2801 0.2006 0.073 Uiso 1 1 calc R . .
H1B H 0.4484 0.1873 0.2003 0.073 Uiso 1 1 calc R . .
C2 C 0.3495(14) 0.2407(16) 0.2402(14) 0.056(7) Uani 1 1 d U . .
H2A H 0.3361 0.2160 0.2849 0.083 Uiso 1 1 calc R . .
H2B H 0.3218 0.2126 0.1957 0.083 Uiso 1 1 calc R . .
H2C H 0.3332 0.2954 0.2463 0.083 Uiso 1 1 calc R . .
C3 C 0.464(2) 0.3410(18) 0.361(2) 0.100(11) Uani 1 1 d U . .
H3A H 0.4944 0.3834 0.3406 0.120 Uiso 1 1 calc R . .
H3B H 0.4079 0.3467 0.3459 0.120 Uiso 1 1 calc R . .
C4 C 0.471(2) 0.357(2) 0.446(2) 0.099(11) Uani 1 1 d U . .
H4A H 0.4485 0.3120 0.4676 0.149 Uiso 1 1 calc R . .
H4B H 0.4427 0.4041 0.4626 0.149 Uiso 1 1 calc R . .
H4C H 0.5274 0.3637 0.4618 0.149 Uiso 1 1 calc R . .
C5 C 0.4693(14) 0.1801(16) 0.376(2) 0.088(10) Uani 1 1 d U . .
H5A H 0.5101 0.1824 0.4178 0.106 Uiso 1 1 calc R . .
H5B H 0.4185 0.1968 0.3986 0.106 Uiso 1 1 calc R . .
C6 C 0.4594(15) 0.0912(17) 0.336(2) 0.112(13) Uani 1 1 d U . .
H6A H 0.4127 0.0868 0.3018 0.168 Uiso 1 1 calc R . .
H6B H 0.4528 0.0556 0.3747 0.168 Uiso 1 1 calc R . .
H6C H 0.5068 0.0772 0.3081 0.168 Uiso 1 1 calc R . .
C7 C 0.6744(14) 0.3954(14) 0.0190(13) 0.047(6) Uani 1 1 d U . .
H7A H 0.6226 0.4101 0.0400 0.056 Uiso 1 1 calc R . .
H7B H 0.7159 0.4280 0.0491 0.056 Uiso 1 1 calc R . .
C8 C 0.6749(15) 0.4147(14) -0.0613(13) 0.052(6) Uani 1 1 d U . .
H8A H 0.7282 0.4074 -0.0805 0.078 Uiso 1 1 calc R . .
H8B H 0.6598 0.4693 -0.0628 0.078 Uiso 1 1 calc R . .
H8C H 0.6370 0.3800 -0.0926 0.078 Uiso 1 1 calc R . .
C9 C 0.7658(14) 0.2629(13) -0.0410(13) 0.048(6) Uani 1 1 d U . .
H9A H 0.7774 0.2069 -0.0395 0.057 Uiso 1 1 calc R . .
H9B H 0.7432 0.2688 -0.0918 0.057 Uiso 1 1 calc R . .
C10 C 0.8443(15) 0.312(2) -0.0274(17) 0.085(10) Uani 1 1 d U . .
H10A H 0.8366 0.3640 -0.0437 0.127 Uiso 1 1 calc R . .
H10B H 0.8863 0.2854 -0.0561 0.127 Uiso 1 1 calc R . .
H10C H 0.8596 0.3180 0.0264 0.127 Uiso 1 1 calc R . .
C11 C 0.5996(14) 0.2459(13) -0.0129(12) 0.044(6) Uani 1 1 d U . .
H11A H 0.5580 0.2511 0.0248 0.053 Uiso 1 1 calc R . .
H11B H 0.5818 0.2742 -0.0553 0.053 Uiso 1 1 calc R . .
C12 C 0.6071(19) 0.1596(15) -0.0417(16) 0.073(9) Uani 1 1 d U . .
H12A H 0.6520 0.1531 -0.0749 0.109 Uiso 1 1 calc R . .
H12B H 0.5582 0.1405 -0.0697 0.109 Uiso 1 1 calc R . .
H12C H 0.6161 0.1296 0.0010 0.109 Uiso 1 1 calc R . .
C13 C 0.6676(19) -0.0401(15) 0.1440(15) 0.077(9) Uani 1 1 d U . .
H13A H 0.6578 -0.0096 0.1011 0.093 Uiso 1 1 calc R . .
H13B H 0.6819 -0.0937 0.1231 0.093 Uiso 1 1 calc R . .
C14 C 0.5903(17) -0.0450(15) 0.1869(16) 0.081(10) Uani 1 1 d U . .
H14A H 0.5974 -0.0801 0.2258 0.121 Uiso 1 1 calc R . .
H14B H 0.5469 -0.0652 0.1517 0.121 Uiso 1 1 calc R . .
H14C H 0.5774 0.0074 0.2106 0.121 Uiso 1 1 calc R . .
C15 C 0.7583(17) -0.0509(12) 0.2792(13) 0.052(7) Uani 1 1 d U . .
H15A H 0.8080 -0.0335 0.3079 0.063 Uiso 1 1 calc R . .
H15B H 0.7138 -0.0369 0.3123 0.063 Uiso 1 1 calc R . .
C16 C 0.7588(18) -0.1392(13) 0.2628(15) 0.066(8) Uani 1 1 d U . .
H16A H 0.7240 -0.1561 0.2186 0.099 Uiso 1 1 calc R . .
H16B H 0.7399 -0.1627 0.3063 0.099 Uiso 1 1 calc R . .
H16C H 0.8130 -0.1560 0.2528 0.099 Uiso 1 1 calc R . .
C17 C 0.8311(18) -0.0306(14) 0.1379(15) 0.065(7) Uani 1 1 d U . .
H17A H 0.8243 -0.0877 0.1233 0.078 Uiso 1 1 calc R . .
H17B H 0.8271 -0.0046 0.0915 0.078 Uiso 1 1 calc R . .
C18 C 0.9154(19) -0.013(2) 0.1758(19) 0.093(10) Uani 1 1 d U . .
H18A H 0.9235 0.0433 0.1886 0.139 Uiso 1 1 calc R . .
H18B H 0.9557 -0.0334 0.1410 0.139 Uiso 1 1 calc R . .
H18C H 0.9200 -0.0391 0.2217 0.139 Uiso 1 1 calc R . .
C19 C 0.8958(16) 0.2599(16) 0.5316(18) 0.075(9) Uani 1 1 d U . .
H19A H 0.9133 0.2319 0.5743 0.089 Uiso 1 1 calc R . .
H19B H 0.9371 0.2538 0.4936 0.089 Uiso 1 1 calc R . .
C20 C 0.889(2) 0.3482(16) 0.5600(17) 0.092(11) Uani 1 1 d U . .
H20A H 0.8700 0.3763 0.5183 0.138 Uiso 1 1 calc R . .
H20B H 0.9406 0.3697 0.5792 0.138 Uiso 1 1 calc R . .
H20C H 0.8508 0.3545 0.6003 0.138 Uiso 1 1 calc R . .
C21 C 0.8208(13) 0.1109(12) 0.4982(13) 0.044(6) Uani 1 1 d U . .
H21A H 0.7792 0.0787 0.4679 0.053 Uiso 1 1 calc R . .
H21B H 0.8727 0.0965 0.4771 0.053 Uiso 1 1 calc R . .
C22 C 0.8201(12) 0.0924(12) 0.5793(12) 0.038(5) Uani 1 1 d U . .
H22A H 0.8525 0.1317 0.6116 0.058 Uiso 1 1 calc R . .
H22B H 0.8420 0.0404 0.5824 0.058 Uiso 1 1 calc R . .
H22C H 0.7655 0.0931 0.5962 0.058 Uiso 1 1 calc R . .
C23 C 0.7288(13) 0.2443(18) 0.5587(12) 0.057(7) Uani 1 1 d U . .
H23A H 0.7492 0.2339 0.6091 0.069 Uiso 1 1 calc R . .
H23B H 0.7218 0.3015 0.5605 0.069 Uiso 1 1 calc R . .
C24 C 0.6478(14) 0.2037(15) 0.5435(14) 0.055(6) Uani 1 1 d U . .
H24A H 0.6301 0.2070 0.4913 0.082 Uiso 1 1 calc R . .
H24B H 0.6096 0.2294 0.5776 0.082 Uiso 1 1 calc R . .
H24C H 0.6518 0.1486 0.5518 0.082 Uiso 1 1 calc R . .
C25 C 0.6589(15) 0.5414(14) 0.3823(16) 0.061(7) Uani 1 1 d U . .
H25A H 0.6620 0.5149 0.4284 0.074 Uiso 1 1 calc R . .
H25B H 0.6666 0.5984 0.3975 0.074 Uiso 1 1 calc R . .
C26 C 0.5754(18) 0.526(2) 0.3445(17) 0.085(9) Uani 1 1 d U . .
H26A H 0.5752 0.5421 0.2936 0.127 Uiso 1 1 calc R . .
H26B H 0.5366 0.5569 0.3742 0.127 Uiso 1 1 calc R . .
H26C H 0.5614 0.4705 0.3416 0.127 Uiso 1 1 calc R . .
C27 C 0.7314(15) 0.5575(12) 0.2371(13) 0.048(6) Uani 1 1 d U . .
H27A H 0.7771 0.5437 0.2055 0.058 Uiso 1 1 calc R . .
H27B H 0.6827 0.5378 0.2078 0.058 Uiso 1 1 calc R . .
C28 C 0.7280(16) 0.6497(13) 0.2526(15) 0.059(7) Uani 1 1 d U . .
H28A H 0.6856 0.6643 0.2872 0.089 Uiso 1 1 calc R . .
H28B H 0.7174 0.6714 0.2051 0.089 Uiso 1 1 calc R . .
H28C H 0.7789 0.6707 0.2752 0.089 Uiso 1 1 calc R . .
C29 C 0.8243(14) 0.5514(15) 0.3738(16) 0.061(7) Uani 1 1 d U . .
H29A H 0.8123 0.6064 0.3918 0.073 Uiso 1 1 calc R . .
H29B H 0.8344 0.5237 0.4185 0.073 Uiso 1 1 calc R . .
C30 C 0.8964(15) 0.5501(16) 0.3298(15) 0.064(7) Uani 1 1 d U . .
H30A H 0.9080 0.4958 0.3108 0.097 Uiso 1 1 calc R . .
H30B H 0.9411 0.5730 0.3619 0.097 Uiso 1 1 calc R . .
H30C H 0.8880 0.5805 0.2873 0.097 Uiso 1 1 calc R . .
N N 0.9896(10) 0.2774(10) 0.2245(10) 0.079(7) Uani 1 1 d DU . .
C31 C 1.0464(13) 0.2453(15) 0.2559(17) 0.079(7) Uani 1 1 d DU . .
H31 H 1.0307 0.2075 0.2875 0.095 Uiso 1 1 calc R . .
C32 C 1.1329(13) 0.2564(13) 0.2520(14) 0.050(6) Uani 1 1 d U . .
H32A H 1.1576 0.2053 0.2419 0.075 Uiso 1 1 calc R . .
H32B H 1.1544 0.2833 0.2999 0.075 Uiso 1 1 calc R . .
H32C H 1.1443 0.2881 0.2114 0.075 Uiso 1 1 calc R . .
C33 C 1.0130(8) 0.3338(10) 0.1875(7) 0.096(8) Uani 1 1 d GDU . .
C34 C 1.0166(10) 0.3141(12) 0.1102(7) 0.102(9) Uani 1 1 d GU . .
H34 H 1.0067 0.2615 0.0886 0.122 Uiso 1 1 calc R . .
C35 C 1.0347(9) 0.3714(13) 0.0644(7) 0.134(11) Uani 1 1 d GU . .
H35 H 1.0371 0.3579 0.0116 0.161 Uiso 1 1 calc R . .
C36 C 1.0491(9) 0.4484(12) 0.0959(8) 0.147(12) Uani 1 1 d GU . .
H36 H 1.0615 0.4875 0.0646 0.177 Uiso 1 1 calc R . .
C37 C 1.0456(11) 0.4681(11) 0.1732(9) 0.129(11) Uani 1 1 d GU . .
H37 H 1.0555 0.5207 0.1947 0.154 Uiso 1 1 calc R . .
C38 C 1.0275(8) 0.4108(10) 0.2190(8) 0.111(9) Uani 1 1 d GU . .
H38 H 1.0251 0.4242 0.2718 0.133 Uiso 1 1 calc R . .
B1 B 0.8097(13) 0.8185(15) 0.5178(16) 0.038(7) Uani 1 1 d . . .
C39 C 0.8742(12) 0.8354(12) 0.4551(12) 0.035(4) Uani 1 1 d U . .
C40 C 0.8946(13) 0.7772(12) 0.3961(11) 0.036(4) Uani 1 1 d U . .
H40 H 0.8734 0.7256 0.3955 0.044 Uiso 1 1 calc R . .
C41 C 0.9445(13) 0.7932(14) 0.3394(12) 0.042(5) Uani 1 1 d U . .
H41 H 0.9571 0.7528 0.3010 0.050 Uiso 1 1 calc R . .
C42 C 0.9762(13) 0.8695(13) 0.3391(12) 0.040(5) Uani 1 1 d U . .
H42 H 1.0105 0.8810 0.3008 0.048 Uiso 1 1 calc R . .
C43 C 0.9573(13) 0.9259(14) 0.3935(12) 0.041(5) Uani 1 1 d U . .
H43 H 0.9780 0.9776 0.3935 0.050 Uiso 1 1 calc R . .
C44 C 0.9074(13) 0.9086(12) 0.4503(12) 0.037(4) Uani 1 1 d U . .
H44 H 0.8955 0.9499 0.4880 0.044 Uiso 1 1 calc R . .
C45 C 0.8249(12) 0.8726(11) 0.5974(11) 0.029(4) Uani 1 1 d U . .
C46 C 0.9002(12) 0.8965(11) 0.6252(12) 0.031(4) Uani 1 1 d U . .
H46 H 0.9439 0.8822 0.5950 0.038 Uiso 1 1 calc R . .
C47 C 0.9152(13) 0.9395(12) 0.6936(13) 0.040(4) Uani 1 1 d U . .
H47 H 0.9682 0.9536 0.7103 0.048 Uiso 1 1 calc R . .
C48 C 0.8519(14) 0.9624(12) 0.7389(13) 0.042(4) Uani 1 1 d U . .
H48 H 0.8607 0.9939 0.7858 0.050 Uiso 1 1 calc R . .
C49 C 0.7775(14) 0.9385(12) 0.7140(13) 0.042(5) Uani 1 1 d U . .
H49 H 0.7339 0.9503 0.7452 0.050 Uiso 1 1 calc R . .
C50 C 0.7649(13) 0.8978(12) 0.6449(12) 0.036(4) Uani 1 1 d U . .
H50 H 0.7116 0.8857 0.6279 0.043 Uiso 1 1 calc R . .
C51 C 0.8150(12) 0.7282(12) 0.5391(12) 0.036(4) Uani 1 1 d U . .
C52 C 0.8892(13) 0.6891(13) 0.5415(12) 0.040(5) Uani 1 1 d U . .
H52 H 0.9357 0.7148 0.5274 0.047 Uiso 1 1 calc R . .
C53 C 0.8949(15) 0.6140(14) 0.5643(14) 0.052(5) Uani 1 1 d U . .
H53 H 0.9443 0.5883 0.5622 0.063 Uiso 1 1 calc R . .
C54 C 0.8311(15) 0.5778(12) 0.5889(13) 0.048(5) Uani 1 1 d U . .
H54 H 0.8370 0.5283 0.6069 0.058 Uiso 1 1 calc R . .
C55 C 0.7595(15) 0.6104(13) 0.5887(14) 0.052(6) Uani 1 1 d U . .
H55 H 0.7146 0.5833 0.6044 0.062 Uiso 1 1 calc R . .
C56 C 0.7512(13) 0.6872(11) 0.5641(13) 0.040(5) Uani 1 1 d U . .
H56 H 0.7006 0.7105 0.5651 0.048 Uiso 1 1 calc R . .
C57 C 0.7232(13) 0.8329(13) 0.4778(13) 0.042(5) Uani 1 1 d U . .
C58 C 0.6727(14) 0.7768(16) 0.4332(15) 0.057(6) Uani 1 1 d U . .
H58 H 0.6892 0.7240 0.4276 0.069 Uiso 1 1 calc R . .
C59 C 0.6062(16) 0.7916(17) 0.3997(17) 0.070(7) Uani 1 1 d U . .
H59 H 0.5751 0.7499 0.3731 0.084 Uiso 1 1 calc R . .
C60 C 0.5801(18) 0.8687(18) 0.403(2) 0.084(8) Uani 1 1 d U . .
H60 H 0.5316 0.8795 0.3775 0.101 Uiso 1 1 calc R . .
C61 C 0.6248(15) 0.9283(16) 0.4415(17) 0.067(7) Uani 1 1 d U . .
H61 H 0.6082 0.9810 0.4438 0.081 Uiso 1 1 calc R . .
C62 C 0.6942(13) 0.9102(15) 0.4774(15) 0.052(5) Uani 1 1 d U . .
H62 H 0.7251 0.9521 0.5038 0.062 Uiso 1 1 calc R . .
B2 B 0.6887(18) 0.6909(16) -0.0044(16) 0.047(7) Uani 1 1 d . . .
C63 C 0.6851(15) 0.7819(13) -0.0290(13) 0.048(5) Uani 1 1 d U . .
C64 C 0.6135(15) 0.8226(14) -0.0308(13) 0.049(5) Uani 1 1 d U . .
H64 H 0.5671 0.7989 -0.0140 0.059 Uiso 1 1 calc R . .
C65 C 0.6079(18) 0.8937(14) -0.0551(14) 0.061(6) Uani 1 1 d U . .
H65 H 0.5581 0.9186 -0.0561 0.073 Uiso 1 1 calc R . .
C66 C 0.674(2) 0.9297(16) -0.0783(16) 0.074(7) Uani 1 1 d U . .
H66 H 0.6696 0.9805 -0.0937 0.089 Uiso 1 1 calc R . .
C67 C 0.747(2) 0.8932(17) -0.0800(17) 0.079(7) Uani 1 1 d U . .
H67 H 0.7932 0.9185 -0.0955 0.095 Uiso 1 1 calc R . .
C68 C 0.7499(17) 0.8187(15) -0.0581(15) 0.063(6) Uani 1 1 d U . .
H68 H 0.7982 0.7912 -0.0629 0.075 Uiso 1 1 calc R . .
C69 C 0.7743(14) 0.6722(14) 0.0363(14) 0.050(5) Uani 1 1 d U . .
C70 C 0.8233(17) 0.7322(17) 0.0805(16) 0.069(7) Uani 1 1 d U . .
H70 H 0.8061 0.7846 0.0815 0.083 Uiso 1 1 calc R . .
C71 C 0.8915(19) 0.721(2) 0.1206(19) 0.088(8) Uani 1 1 d U . .
H71 H 0.9227 0.7634 0.1458 0.105 Uiso 1 1 calc R . .
C72 C 0.9126(19) 0.642(2) 0.122(2) 0.090(8) Uani 1 1 d U . .
H72 H 0.9575 0.6299 0.1519 0.108 Uiso 1 1 calc R . .
C73 C 0.8697(16) 0.5814(17) 0.0811(18) 0.076(7) Uani 1 1 d U . .
H73 H 0.8869 0.5290 0.0809 0.091 Uiso 1 1 calc R . .
C74 C 0.8015(15) 0.5964(15) 0.0400(16) 0.062(6) Uani 1 1 d U . .
H74 H 0.7722 0.5535 0.0134 0.074 Uiso 1 1 calc R . .
C75 C 0.6231(13) 0.6734(13) 0.0540(13) 0.041(4) Uani 1 1 d U . .
C76 C 0.6034(13) 0.7312(14) 0.1142(13) 0.046(5) Uani 1 1 d U . .
H76 H 0.6259 0.7824 0.1158 0.055 Uiso 1 1 calc R . .
C77 C 0.5549(14) 0.7163(14) 0.1679(14) 0.047(5) Uani 1 1 d U . .
H77 H 0.5439 0.7569 0.2066 0.057 Uiso 1 1 calc R . .
C78 C 0.5200(14) 0.6428(14) 0.1687(13) 0.044(5) Uani 1 1 d U . .
H78 H 0.4845 0.6329 0.2066 0.053 Uiso 1 1 calc R . .
C79 C 0.5383(12) 0.5847(13) 0.1130(13) 0.040(4) Uani 1 1 d U . .
H79 H 0.5150 0.5339 0.1126 0.048 Uiso 1 1 calc R . .
C80 C 0.5892(13) 0.5983(13) 0.0580(12) 0.040(4) Uani 1 1 d U . .
H80 H 0.6021 0.5562 0.0216 0.048 Uiso 1 1 calc R . .
C81 C 0.6800(13) 0.6332(12) -0.0860(12) 0.036(4) Uani 1 1 d U . .
C82 C 0.6034(12) 0.6106(12) -0.1190(12) 0.036(4) Uani 1 1 d U . .
H82 H 0.5579 0.6282 -0.0929 0.043 Uiso 1 1 calc R . .
C83 C 0.5924(12) 0.5641(12) -0.1878(12) 0.036(4) Uani 1 1 d U . .
H83 H 0.5404 0.5486 -0.2066 0.044 Uiso 1 1 calc R . .
C84 C 0.6575(14) 0.5408(13) -0.2286(13) 0.044(5) Uani 1 1 d U . .
H84 H 0.6516 0.5091 -0.2757 0.052 Uiso 1 1 calc R . .
C85 C 0.7328(13) 0.5655(13) -0.1979(13) 0.043(5) Uani 1 1 d U . .
H85 H 0.7781 0.5516 -0.2260 0.051 Uiso 1 1 calc R . .
C86 C 0.7432(12) 0.6081(13) -0.1305(13) 0.040(4) Uani 1 1 d U . .
H86 H 0.7958 0.6218 -0.1121 0.048 Uiso 1 1 calc R . .
C87 C 0.7838(12) 0.1761(9) 0.7613(6) 0.087(8) Uani 1 1 d GU . .
H87 H 0.8043 0.1251 0.7624 0.104 Uiso 1 1 calc R . .
C88 C 0.8353(11) 0.2407(11) 0.7666(6) 0.093(8) Uani 1 1 d GU . .
H88 H 0.8910 0.2340 0.7713 0.112 Uiso 1 1 calc R . .
C89 C 0.8054(13) 0.3153(10) 0.7650(6) 0.113(9) Uani 1 1 d GU . .
H89 H 0.8405 0.3595 0.7686 0.135 Uiso 1 1 calc R . .
C90 C 0.7239(13) 0.3253(9) 0.7581(7) 0.118(10) Uani 1 1 d GU . .
H90 H 0.7035 0.3763 0.7570 0.141 Uiso 1 1 calc R . .
C91 C 0.6725(11) 0.2606(11) 0.7527(7) 0.110(9) Uani 1 1 d GU . .
H91 H 0.6168 0.2674 0.7480 0.132 Uiso 1 1 calc R . .
C92 C 0.7024(11) 0.1860(10) 0.7543(6) 0.095(8) Uani 1 1 d GU . .
C93 C 0.6440(14) 0.1317(12) 0.7463(7) 0.163(16) Uani 1 1 d GU . .
H93A H 0.6363 0.1114 0.6931 0.244 Uiso 1 1 calc R . .
H93B H 0.5948 0.1553 0.7647 0.244 Uiso 1 1 calc R . .
H93C H 0.6580 0.0888 0.7754 0.244 Uiso 1 1 calc R . .

loop_
 _atom_site_aniso_label
 _atom_site_aniso_U_11
 _atom_site_aniso_U_22
 _atom_site_aniso_U_33
 _atom_site_aniso_U_23
 _atom_site_aniso_U_13
 _atom_site_aniso_U_12
Re1 0.0163(4) 0.0282(4) 0.0523(6) 0.0135(4) 0.0010(4) 0.0026(3)
Re2 0.0186(4) 0.0287(4) 0.0534(6) 0.0158(4) 0.0027(4) 0.0048(3)
Re3 0.0262(5) 0.0280(4) 0.0505(6) 0.0145(4) 0.0024(4) 0.0061(3)
Re4 0.0171(4) 0.0282(4) 0.0553(6) 0.0156(4) -0.0020(4) 0.0005(3)
Re5 0.0255(5) 0.0273(4) 0.0578(6) 0.0175(4) -0.0071(4) -0.0043(3)
Re6 0.0172(4) 0.0449(5) 0.0677(7) 0.0285(5) 0.0018(4) 0.0035(4)
Se1 0.0367(13) 0.0506(14) 0.0595(16) 0.0265(12) 0.0146(11) 0.0229(11)
Se2 0.0239(11) 0.0457(13) 0.0668(17) 0.0314(12) -0.0037(11) -0.0056(10)
Se3 0.0319(13) 0.0446(14) 0.0748(18) 0.0300(13) -0.0128(12) -0.0112(11)
Se4 0.0383(13) 0.0328(12) 0.0561(15) 0.0140(11) -0.0026(11) 0.0089(10)
Se5 0.0229(11) 0.0298(11) 0.0531(14) 0.0128(10) -0.0013(9) -0.0032(8)
Se6 0.0208(11) 0.0424(13) 0.0619(16) 0.0217(11) 0.0028(10) 0.0100(9)
Se7 0.0288(11) 0.0282(11) 0.0525(14) 0.0125(10) -0.0052(10) -0.0008(9)
Se8 0.0244(11) 0.0264(10) 0.0458(13) 0.0116(9) -0.0014(9) 0.0023(8)
P1 0.031(3) 0.073(5) 0.085(6) 0.037(4) -0.008(3) 0.002(3)
P2 0.027(3) 0.027(3) 0.061(4) 0.014(3) -0.003(3) 0.009(2)
P3 0.074(5) 0.032(3) 0.049(4) 0.014(3) -0.006(3) 0.009(3)
P4 0.027(3) 0.029(3) 0.053(4) 0.007(3) -0.007(3) 0.001(2)
P5 0.057(4) 0.037(3) 0.070(5) 0.021(3) -0.022(4) -0.011(3)
C1 0.036(11) 0.10(2) 0.054(16) 0.031(15) -0.002(12) 0.016(14)
C2 0.037(11) 0.079(18) 0.057(16) 0.030(14) 0.016(12) 0.016(13)
C3 0.11(3) 0.056(19) 0.13(2) -0.01(2) 0.03(2) 0.003(19)
C4 0.07(2) 0.12(3) 0.12(2) 0.06(2) 0.03(2) 0.01(2)
C5 0.022(12) 0.066(15) 0.19(3) 0.086(18) 0.006(16) 0.002(12)
C6 0.019(13) 0.064(15) 0.26(4) 0.07(2) -0.030(19) 0.013(13)
C7 0.036(13) 0.051(14) 0.054(13) 0.015(12) -0.014(11) 0.002(11)
C8 0.052(15) 0.041(13) 0.064(14) 0.017(12) -0.019(12) 0.012(12)
C9 0.056(13) 0.036(12) 0.058(15) 0.034(11) -0.006(12) 0.018(10)
C10 0.035(14) 0.14(3) 0.08(2) 0.03(2) -0.007(14) 0.008(14)
C11 0.057(15) 0.053(12) 0.022(12) 0.007(10) -0.010(10) -0.001(12)
C12 0.11(2) 0.043(13) 0.066(19) -0.003(13) 0.013(17) -0.024(15)
C13 0.13(2) 0.045(15) 0.057(17) 0.016(13) -0.055(15) -0.050(17)
C14 0.090(19) 0.051(15) 0.10(2) 0.046(15) -0.076(15) -0.055(15)
C15 0.078(18) 0.028(10) 0.047(15) -0.004(11) -0.024(13) 0.006(12)
C16 0.10(2) 0.025(10) 0.071(18) 0.017(12) -0.031(16) 0.011(13)
C17 0.11(2) 0.033(13) 0.055(17) -0.002(12) -0.002(15) 0.007(14)
C18 0.076(19) 0.10(2) 0.12(3) 0.07(2) 0.002(16) 0.013(18)
C19 0.045(16) 0.070(15) 0.11(2) 0.048(16) -0.046(15) -0.014(14)
C20 0.12(3) 0.061(14) 0.10(2) 0.042(16) -0.06(2) -0.058(17)
C21 0.032(12) 0.036(12) 0.072(14) 0.035(12) 0.000(11) 0.020(10)
C22 0.034(12) 0.036(12) 0.043(11) -0.006(10) -0.002(10) 0.000(10)
C23 0.037(12) 0.11(2) 0.030(13) 0.012(13) -0.012(10) 0.019(12)
C24 0.042(12) 0.058(15) 0.064(17) 0.004(13) -0.009(12) 0.023(11)
C25 0.065(15) 0.031(12) 0.09(2) 0.004(13) 0.032(13) -0.001(12)
C26 0.077(17) 0.10(3) 0.08(2) 0.030(19) 0.013(15) 0.014(19)
C27 0.056(15) 0.032(10) 0.060(16) 0.030(11) -0.019(12) -0.028(11)
C28 0.070(18) 0.035(11) 0.074(18) 0.016(12) -0.021(14) 0.012(12)
C29 0.043(13) 0.047(14) 0.09(2) 0.023(14) -0.031(12) 0.002(12)
C30 0.047(14) 0.067(17) 0.079(19) 0.017(15) -0.031(12) 0.011(14)
N 0.008(7) 0.079(12) 0.168(18) 0.098(13) -0.022(9) -0.012(8)
C31 0.018(8) 0.075(13) 0.162(19) 0.088(13) -0.017(10) -0.001(9)
C32 0.034(9) 0.047(13) 0.078(17) 0.041(13) 0.002(12) 0.013(10)
C33 0.040(15) 0.111(16) 0.127(18) -0.023(16) 0.008(16) 0.001(15)
C34 0.056(16) 0.14(2) 0.118(19) 0.017(15) 0.046(17) 0.004(17)
C35 0.08(2) 0.14(2) 0.19(2) 0.041(17) 0.04(2) -0.01(2)
C36 0.10(2) 0.14(2) 0.20(3) 0.04(2) 0.02(3) -0.01(2)
C37 0.067(19) 0.123(19) 0.20(3) 0.038(18) 0.01(2) 0.021(18)
C38 0.059(17) 0.087(18) 0.18(2) 0.001(15) 0.011(19) -0.021(16)
B1 0.014(11) 0.040(14) 0.069(19) 0.039(13) 0.016(11) 0.004(10)
C39 0.033(11) 0.039(9) 0.034(10) 0.006(8) 0.008(8) -0.001(8)
C40 0.053(12) 0.025(8) 0.035(10) 0.020(7) 0.005(8) 0.015(8)
C41 0.046(12) 0.052(9) 0.027(10) -0.003(9) 0.001(8) 0.012(9)
C42 0.040(12) 0.057(10) 0.029(10) 0.025(8) 0.005(8) 0.010(9)
C43 0.044(12) 0.044(10) 0.038(11) 0.015(8) 0.003(9) -0.008(9)
C44 0.040(11) 0.033(8) 0.039(11) 0.008(8) 0.008(8) 0.001(8)
C45 0.034(9) 0.022(9) 0.035(10) 0.017(7) 0.002(7) 0.012(7)
C46 0.033(8) 0.021(9) 0.045(10) 0.021(7) 0.005(8) -0.004(8)
C47 0.034(9) 0.035(11) 0.051(11) 0.012(8) -0.005(8) -0.002(9)
C48 0.055(10) 0.032(11) 0.043(11) 0.022(8) 0.003(8) 0.002(9)
C49 0.044(9) 0.036(11) 0.049(10) 0.012(8) 0.021(9) 0.005(9)
C50 0.038(9) 0.034(11) 0.040(10) 0.019(8) 0.013(7) 0.005(8)
C51 0.028(9) 0.030(9) 0.050(12) 0.010(9) 0.003(9) -0.007(7)
C52 0.035(9) 0.040(10) 0.046(12) 0.011(9) 0.011(9) 0.002(8)
C53 0.055(11) 0.052(12) 0.056(14) 0.028(11) 0.009(11) 0.023(10)
C54 0.068(12) 0.023(10) 0.056(14) 0.009(9) 0.014(11) 0.011(8)
C55 0.060(11) 0.035(10) 0.066(14) 0.025(10) 0.021(12) -0.002(9)
C56 0.035(9) 0.024(9) 0.064(14) 0.014(9) 0.014(10) -0.003(7)
C57 0.031(10) 0.047(11) 0.048(13) 0.013(10) 0.006(8) -0.006(8)
C58 0.032(11) 0.067(11) 0.072(16) 0.010(12) -0.009(10) -0.006(9)
C59 0.052(13) 0.065(11) 0.090(18) 0.014(14) -0.030(12) -0.008(11)
C60 0.052(15) 0.074(13) 0.13(2) 0.020(16) -0.028(13) -0.002(11)
C61 0.040(12) 0.054(11) 0.112(19) 0.034(13) -0.012(12) -0.006(10)
C62 0.030(10) 0.059(10) 0.070(15) 0.016(11) 0.005(9) 0.005(9)
B2 0.057(19) 0.041(15) 0.043(17) 0.006(13) 0.002(13) -0.019(14)
C63 0.058(12) 0.036(11) 0.048(13) 0.003(10) -0.001(11) -0.005(8)
C64 0.055(11) 0.050(11) 0.045(13) 0.016(10) -0.009(11) -0.005(9)
C65 0.080(13) 0.043(11) 0.058(15) 0.014(11) -0.030(12) -0.007(10)
C66 0.106(17) 0.041(13) 0.080(17) 0.038(12) -0.011(15) -0.005(10)
C67 0.095(15) 0.056(13) 0.090(18) 0.028(13) 0.009(16) -0.014(12)
C68 0.065(12) 0.050(12) 0.077(16) 0.019(12) 0.015(13) 0.002(10)
C69 0.039(12) 0.051(11) 0.066(15) 0.031(11) -0.003(9) 0.001(9)
C70 0.064(15) 0.059(11) 0.082(18) 0.010(13) -0.013(12) 0.001(11)
C71 0.076(17) 0.078(12) 0.11(2) 0.017(16) -0.036(14) -0.016(14)
C72 0.061(16) 0.087(15) 0.12(2) 0.034(16) -0.033(14) -0.006(13)
C73 0.048(14) 0.061(12) 0.13(2) 0.054(13) -0.022(12) -0.009(11)
C74 0.048(13) 0.048(10) 0.097(17) 0.049(11) -0.015(11) -0.007(10)
C75 0.032(11) 0.047(10) 0.048(11) 0.026(8) -0.010(8) -0.008(9)
C76 0.037(12) 0.046(10) 0.054(13) 0.013(8) -0.014(9) -0.025(9)
C77 0.051(13) 0.042(9) 0.051(12) 0.018(9) -0.002(9) 0.001(9)
C78 0.044(12) 0.052(11) 0.040(11) 0.023(8) 0.007(9) -0.003(9)
C79 0.032(11) 0.040(9) 0.052(12) 0.022(8) 0.002(8) 0.001(9)
C80 0.047(12) 0.041(9) 0.035(11) 0.018(8) 0.001(8) -0.003(9)
C81 0.036(9) 0.027(10) 0.046(11) 0.013(8) 0.000(7) -0.012(8)
C82 0.032(8) 0.037(11) 0.041(10) 0.013(8) 0.002(8) 0.005(8)
C83 0.025(8) 0.033(10) 0.052(11) 0.008(8) -0.004(8) 0.005(8)
C84 0.044(10) 0.044(12) 0.044(11) 0.005(9) 0.009(8) 0.003(9)
C85 0.032(8) 0.041(12) 0.061(11) 0.021(9) 0.018(9) 0.003(9)
C86 0.024(8) 0.044(12) 0.058(11) 0.027(8) 0.002(8) -0.007(8)
C87 0.148(19) 0.066(13) 0.044(14) -0.023(13) 0.051(16) 0.023(13)
C88 0.139(19) 0.097(16) 0.045(15) 0.003(16) 0.030(16) 0.010(13)
C89 0.20(2) 0.078(13) 0.063(17) 0.003(17) 0.01(2) -0.002(17)
C90 0.21(3) 0.073(14) 0.072(18) -0.009(17) 0.03(2) 0.046(16)
C91 0.15(2) 0.116(16) 0.058(17) -0.015(18) 0.041(18) 0.043(14)
C92 0.144(18) 0.085(14) 0.056(16) -0.010(15) 0.045(18) 0.000(13)
C93 0.19(3) 0.16(2) 0.13(3) 0.01(3) 0.01(3) -0.06(3)

_geom_special_details
;
 All esds (except the esd in the dihedral angle between two l.s. planes)
 are estimated using the full covariance matrix.  The cell esds are taken
 into account individually in the estimation of esds in distances, angles
 and torsion angles; correlations between esds in cell parameters are only
 used when they are defined by crystal symmetry.  An approximate (isotropic)
 treatment of cell esds is used for estimating esds involving l.s. planes.
;

loop_
 _geom_bond_atom_site_label_1
 _geom_bond_atom_site_label_2
 _geom_bond_distance
 _geom_bond_site_symmetry_2
 _geom_bond_publ_flag
Re1 Re2 2.6522(13) . ?
Re1 Re3 2.6437(12) . ?
Re1 Re4 2.6285(12) . ?
Re1 Re5 2.6312(12) . ?
Re1 Se4 2.529(3) . ?
Re1 Se5 2.511(2) . ?
Re1 Se7 2.508(2) . ?
Re1 Se8 2.519(2) . ?
Re1 P1 2.480(7) . ?
Re2 Re3 2.6310(12) . ?
Re2 Re5 2.6306(14) . ?
Re2 Re6 2.6356(13) . ?
Re2 Se1 2.515(2) . ?
Re2 Se2 2.517(2) . ?
Re2 Se7 2.514(2) . ?
Re2 Se8 2.521(2) . ?
Re2 P2 2.481(6) . ?
Re3 Re4 2.6212(14) . ?
Re3 Re6 2.6440(14) . ?
Re3 Se1 2.525(2) . ?
Re3 Se5 2.519(2) . ?
Re3 Se6 2.525(2) . ?
Re3 Se7 2.515(2) . ?
Re3 P3 2.473(6) . ?
Re4 Re5 2.6361(12) . ?
Re4 Re6 2.6312(13) . ?
Re4 Se3 2.515(2) . ?
Re4 Se4 2.517(2) . ?
Re4 Se5 2.512(2) . ?
Re4 Se6 2.504(2) . ?
Re4 P4 2.462(6) . ?
Re5 Re6 2.6345(13) . ?
Re5 Se2 2.502(3) . ?
Re5 Se3 2.513(2) . ?
Re5 Se4 2.513(3) . ?
Re5 Se8 2.519(2) . ?
Re5 P5 2.478(7) . ?
Re6 Se1 2.517(3) . ?
Re6 Se2 2.521(2) . ?
Re6 Se3 2.522(3) . ?
Re6 Se6 2.521(2) . ?
Re6 N 2.311(17) . ?
P1 C1 1.73(2) . ?
P1 C3 1.87(3) . ?
P1 C5 1.79(3) . ?
P2 C7 1.82(2) . ?
P2 C9 1.86(2) . ?
P2 C11 1.83(2) . ?
P3 C13 1.78(2) . ?
P3 C15 1.79(2) . ?
P3 C17 1.86(3) . ?
P4 C19 1.81(2) . ?
P4 C21 1.84(2) . ?
P4 C23 1.83(2) . ?
P5 C25 1.85(2) . ?
P5 C27 1.83(2) . ?
P5 C29 1.79(2) . ?
C1 C2 1.49(3) . ?
C3 C4 1.51(4) . ?
C5 C6 1.61(4) . ?
C7 C8 1.51(3) . ?
C9 C10 1.56(4) . ?
C11 C12 1.52(3) . ?
C13 C14 1.54(4) . ?
C15 C16 1.51(3) . ?
C17 C18 1.56(4) . ?
C19 C20 1.55(4) . ?
C21 C22 1.53(3) . ?
C23 C24 1.52(3) . ?
C25 C26 1.54(4) . ?
C27 C28 1.58(3) . ?
C29 C30 1.47(4) . ?
N C31 1.26(3) . ?
N C33 1.30(2) . ?
C31 C32 1.47(3) . ?
C33 C34 1.390 . ?
C33 C38 1.390 . ?
C34 C35 1.390 . ?
C35 C36 1.390 . ?
C36 C37 1.390 . ?
C37 C38 1.390 . ?
B1 C39 1.64(3) . ?
B1 C45 1.62(4) . ?
B1 C51 1.64(3) . ?
B1 C57 1.64(3) . ?
C39 C40 1.42(3) . ?
C39 C44 1.38(3) . ?
C40 C41 1.39(3) . ?
C41 C42 1.41(3) . ?
C42 C43 1.34(3) . ?
C43 C44 1.40(3) . ?
C45 C46 1.38(3) . ?
C45 C50 1.39(3) . ?
C46 C47 1.37(3) . ?
C47 C48 1.40(3) . ?
C48 C49 1.36(3) . ?
C49 C50 1.36(3) . ?
C51 C52 1.43(3) . ?
C51 C56 1.39(3) . ?
C52 C53 1.40(3) . ?
C53 C54 1.35(3) . ?
C54 C55 1.34(3) . ?
C55 C56 1.45(3) . ?
C57 C58 1.43(3) . ?
C57 C62 1.42(3) . ?
C58 C59 1.30(3) . ?
C59 C60 1.40(4) . ?
C60 C61 1.37(4) . ?
C61 C62 1.37(3) . ?
B2 C63 1.68(3) . ?
B2 C69 1.65(4) . ?
B2 C75 1.60(3) . ?
B2 C81 1.67(3) . ?
C63 C64 1.41(3) . ?
C63 C68 1.40(3) . ?
C64 C65 1.35(3) . ?
C65 C66 1.36(4) . ?
C66 C67 1.40(4) . ?
C67 C68 1.38(4) . ?
C69 C70 1.45(4) . ?
C69 C74 1.40(3) . ?
C70 C71 1.36(4) . ?
C71 C72 1.42(4) . ?
C72 C73 1.37(4) . ?
C73 C74 1.39(3) . ?
C75 C76 1.43(3) . ?
C75 C80 1.41(3) . ?
C76 C77 1.33(3) . ?
C77 C78 1.38(3) . ?
C78 C79 1.38(3) . ?
C79 C80 1.37(3) . ?
C81 C82 1.43(3) . ?
C81 C86 1.40(3) . ?
C82 C83 1.39(3) . ?
C83 C84 1.38(3) . ?
C84 C85 1.40(3) . ?
C85 C86 1.34(3) . ?
C87 C88 1.390 . ?
C87 C92 1.390 . ?
C88 C89 1.390 . ?
C89 C90 1.390 . ?
C90 C91 1.390 . ?
C91 C92 1.390 . ?
C92 C93 1.3375 . ?

loop_
 _geom_angle_atom_site_label_1
 _geom_angle_atom_site_label_2
 _geom_angle_atom_site_label_3
 _geom_angle
 _geom_angle_site_symmetry_1
 _geom_angle_site_symmetry_3
 _geom_angle_publ_flag
Re2 Re1 Re3 59.58(3) . . ?
Re2 Re1 Re4 89.47(4) . . ?
Re2 Re1 Re5 59.72(3) . . ?
Re2 Re1 Se4 117.93(7) . . ?
Re2 Re1 Se5 118.02(6) . . ?
Re2 Re1 Se7 58.25(6) . . ?
Re2 Re1 Se8 58.27(5) . . ?
Re2 Re1 P1 136.27(18) . . ?
Re3 Re1 Re4 59.63(3) . . ?
Re3 Re1 Re5 89.73(4) . . ?
Re3 Re1 Se4 117.99(6) . . ?
Re3 Re1 Se5 58.46(6) . . ?
Re3 Re1 Se7 58.38(5) . . ?
Re3 Re1 Se8 117.84(6) . . ?
Re3 Re1 P1 137.00(19) . . ?
Re4 Re1 Re5 60.16(3) . . ?
Re4 Re1 Se4 58.39(6) . . ?
Re4 Re1 Se5 58.46(5) . . ?
Re4 Re1 Se7 117.99(6) . . ?
Re4 Re1 Se8 118.65(6) . . ?
Re4 Re1 P1 134.21(18) . . ?
Re5 Re1 Se4 58.24(6) . . ?
Re5 Re1 Se5 118.61(6) . . ?
Re5 Re1 Se7 117.96(6) . . ?
Re5 Re1 Se8 58.52(5) . . ?
Re5 Re1 P1 133.26(19) . . ?
Se4 Re1 Se5 90.14(8) . . ?
Se4 Re1 Se7 175.45(8) . . ?
Se4 Re1 Se8 90.41(8) . . ?
Se4 Re1 P1 90.4(2) . . ?
Se5 Re1 Se7 89.86(8) . . ?
Se5 Re1 Se8 175.91(8) . . ?
Se5 Re1 P1 92.54(17) . . ?
Se7 Re1 Se8 89.27(8) . . ?
Se7 Re1 P1 94.1(2) . . ?
Se8 Re1 P1 91.51(17) . . ?
Re1 Re2 Re3 60.05(3) . . ?
Re1 Re2 Re5 59.74(3) . . ?
Re1 Re2 Re6 90.06(4) . . ?
Re1 Re2 Se1 118.76(6) . . ?
Re1 Re2 Se2 117.86(7) . . ?
Re1 Re2 Se7 58.00(6) . . ?
Re1 Re2 Se8 58.22(5) . . ?
Re1 Re2 P2 136.06(13) . . ?
Re3 Re2 Re5 90.02(4) . . ?
Re3 Re2 Re6 60.27(3) . . ?
Re3 Re2 Se1 58.73(6) . . ?
Re3 Re2 Se2 118.78(6) . . ?
Re3 Re2 Se7 58.47(5) . . ?
Re3 Re2 Se8 118.27(6) . . ?
Re3 Re2 P2 136.90(13) . . ?
Re5 Re2 Re6 60.04(4) . . ?
Re5 Re2 Se1 118.48(7) . . ?
Re5 Re2 Se2 58.12(6) . . ?
Re5 Re2 Se7 117.73(7) . . ?
Re5 Re2 Se8 58.51(6) . . ?
Re5 Re2 P2 133.07(13) . . ?
Re6 Re2 Se1 58.46(7) . . ?
Re6 Re2 Se2 58.54(6) . . ?
Re6 Re2 Se7 118.71(6) . . ?
Re6 Re2 Se8 118.54(7) . . ?
Re6 Re2 P2 133.80(14) . . ?
Se1 Re2 Se2 90.30(9) . . ?
Se1 Re2 Se7 90.77(8) . . ?
Se1 Re2 Se8 176.32(9) . . ?
Se1 Re2 P2 92.41(14) . . ?
Se2 Re2 Se7 175.61(9) . . ?
Se2 Re2 Se8 89.57(8) . . ?
Se2 Re2 P2 89.89(15) . . ?
Se7 Re2 Se8 89.09(7) . . ?
Se7 Re2 P2 94.33(15) . . ?
Se8 Re2 P2 91.27(13) . . ?
Re1 Re3 Re2 60.37(3) . . ?
Re1 Re3 Re4 59.90(3) . . ?
Re1 Re3 Re6 90.07(4) . . ?
Re1 Re3 Se1 118.69(6) . . ?
Re1 Re3 Se5 58.13(5) . . ?
Re1 Re3 Se6 118.07(7) . . ?
Re1 Re3 Se7 58.10(6) . . ?
Re1 Re3 P3 135.52(18) . . ?
Re2 Re3 Re4 90.09(4) . . ?
Re2 Re3 Re6 59.95(3) . . ?
Re2 Re3 Se1 58.34(5) . . ?
Re2 Re3 Se5 118.49(6) . . ?
Re2 Re3 Se6 118.27(6) . . ?
Re2 Re3 Se7 58.45(5) . . ?
Re2 Re3 P3 135.53(16) . . ?
Re4 Re3 Re6 59.96(4) . . ?
Re4 Re3 Se1 118.18(8) . . ?
Re4 Re3 Se5 58.45(6) . . ?
Re4 Re3 Se6 58.19(6) . . ?
Re4 Re3 Se7 117.99(6) . . ?
Re4 Re3 P3 134.37(16) . . ?
Re6 Re3 Se1 58.23(7) . . ?
Re6 Re3 Se5 118.40(7) . . ?
Re6 Re3 Se6 58.33(6) . . ?
Re6 Re3 Se7 118.37(6) . . ?
Re6 Re3 P3 134.40(18) . . ?
Se1 Re3 Se5 175.99(8) . . ?
Se1 Re3 Se6 89.79(8) . . ?
Se1 Re3 Se7 90.51(8) . . ?
Se1 Re3 P3 92.03(18) . . ?
Se5 Re3 Se6 89.89(8) . . ?
Se5 Re3 Se7 89.50(8) . . ?
Se5 Re3 P3 91.97(17) . . ?
Se6 Re3 Se7 175.61(8) . . ?
Se6 Re3 P3 91.25(17) . . ?
Se7 Re3 P3 93.11(17) . . ?
Re1 Re4 Re3 60.48(3) . . ?
Re1 Re4 Re5 59.97(3) . . ?
Re1 Re4 Re6 90.68(4) . . ?
Re1 Re4 Se3 118.31(6) . . ?
Re1 Re4 Se4 58.82(6) . . ?
Re1 Re4 Se5 58.42(5) . . ?
Re1 Re4 Se6 119.46(7) . . ?
Re1 Re4 P4 133.28(14) . . ?
Re3 Re4 Re5 90.11(4) . . ?
Re3 Re4 Re6 60.45(4) . . ?
Re3 Re4 Se3 119.06(8) . . ?
Re3 Re4 Se4 119.27(7) . . ?
Re3 Re4 Se5 58.75(6) . . ?
Re3 Re4 Se6 58.99(6) . . ?
Re3 Re4 P4 132.40(13) . . ?
Re5 Re4 Re6 60.02(3) . . ?
Re5 Re4 Se3 58.34(6) . . ?
Re5 Re4 Se4 58.31(6) . . ?
Re5 Re4 Se5 118.38(6) . . ?
Re5 Re4 Se6 118.76(7) . . ?
Re5 Re4 P4 137.46(14) . . ?
Re6 Re4 Se3 58.63(7) . . ?
Re6 Re4 Se4 118.33(7) . . ?
Re6 Re4 Se5 119.18(7) . . ?
Re6 Re4 Se6 58.75(6) . . ?
Re6 Re4 P4 135.96(14) . . ?
Se3 Re4 Se4 88.60(9) . . ?
Se3 Re4 Se5 176.52(9) . . ?
Se3 Re4 Se6 90.29(8) . . ?
Se3 Re4 P4 94.35(15) . . ?
Se4 Re4 Se5 90.38(8) . . ?
Se4 Re4 Se6 176.97(9) . . ?
Se4 Re4 P4 92.34(14) . . ?
Se5 Re4 Se6 90.56(8) . . ?
Se5 Re4 P4 89.02(14) . . ?
Se6 Re4 P4 90.56(14) . . ?
Re1 Re5 Re2 60.54(3) . . ?
Re1 Re5 Re4 59.87(3) . . ?
Re1 Re5 Re6 90.55(4) . . ?
Re1 Re5 Se2 119.19(7) . . ?
Re1 Re5 Se3 118.29(6) . . ?
Re1 Re5 Se4 58.84(6) . . ?
Re1 Re5 Se8 58.52(5) . . ?
Re1 Re5 P5 132.27(18) . . ?
Re2 Re5 Re4 89.78(4) . . ?
Re2 Re5 Re6 60.08(4) . . ?
Re2 Re5 Se2 58.66(6) . . ?
Re2 Re5 Se3 118.67(7) . . ?
Re2 Re5 Se4 119.35(7) . . ?
Re2 Re5 Se8 58.56(5) . . ?
Re2 Re5 P5 133.65(16) . . ?
Re4 Re5 Re6 59.90(3) . . ?
Re4 Re5 Se2 118.60(6) . . ?
Re4 Re5 Se3 58.42(6) . . ?
Re4 Re5 Se4 58.47(5) . . ?
Re4 Re5 Se8 118.36(6) . . ?
Re4 Re5 P5 136.48(17) . . ?
Re6 Re5 Se2 58.72(6) . . ?
Re6 Re5 Se3 58.61(7) . . ?
Re6 Re5 Se4 118.37(6) . . ?
Re6 Re5 Se8 118.63(7) . . ?
Re6 Re5 P5 137.17(18) . . ?
Se2 Re5 Se3 90.35(8) . . ?
Se2 Re5 Se4 176.89(8) . . ?
Se2 Re5 Se8 89.93(8) . . ?
Se2 Re5 P5 92.27(19) . . ?
Se3 Re5 Se4 88.74(8) . . ?
Se3 Re5 Se8 176.32(8) . . ?
Se3 Re5 P5 94.38(17) . . ?
Se4 Re5 Se8 90.78(8) . . ?
Se4 Re5 P5 90.76(19) . . ?
Se8 Re5 P5 89.28(16) . . ?
Re2 Re6 Re3 59.78(3) . . ?
Re2 Re6 Re4 89.78(4) . . ?
Re2 Re6 Re5 59.89(3) . . ?
Re2 Re6 Se1 58.37(6) . . ?
Re2 Re6 Se2 58.38(6) . . ?
Re2 Re6 Se3 118.15(7) . . ?
Re2 Re6 Se6 118.25(7) . . ?
Re2 Re6 N 136.9(5) . . ?
Re3 Re6 Re4 59.59(3) . . ?
Re3 Re6 Re5 89.65(4) . . ?
Re3 Re6 Se1 58.52(6) . . ?
Re3 Re6 Se2 118.13(7) . . ?
Re3 Re6 Se3 117.95(7) . . ?
Re3 Re6 Se6 58.48(6) . . ?
Re3 Re6 N 138.9(4) . . ?
Re4 Re6 Re5 60.08(3) . . ?
Re4 Re6 Se1 118.10(7) . . ?
Re4 Re6 Se2 118.09(7) . . ?
Re4 Re6 Se3 58.38(6) . . ?
Re4 Re6 Se6 58.10(6) . . ?
Re4 Re6 N 133.1(5) . . ?
Re5 Re6 Se1 118.24(6) . . ?
Re5 Re6 Se2 58.02(6) . . ?
Re5 Re6 Se3 58.29(6) . . ?
Re5 Re6 Se6 118.17(6) . . ?
Re5 Re6 N 131.4(4) . . ?
Se1 Re6 Se2 90.15(9) . . ?
Se1 Re6 Se3 175.72(8) . . ?
Se1 Re6 Se6 90.07(8) . . ?
Se1 Re6 N 96.0(4) . . ?
Se2 Re6 Se3 89.72(9) . . ?
Se2 Re6 Se6 175.59(8) . . ?
Se2 Re6 N 91.1(5) . . ?
Se3 Re6 Se6 89.74(8) . . ?
Se3 Re6 N 88.3(4) . . ?
Se6 Re6 N 93.3(5) . . ?
Re2 Se1 Re3 62.94(6) . . ?
Re2 Se1 Re6 63.17(7) . . ?
Re3 Se1 Re6 63.25(7) . . ?
Re2 Se2 Re5 63.21(6) . . ?
Re2 Se2 Re6 63.09(6) . . ?
Re5 Se2 Re6 63.26(6) . . ?
Re4 Se3 Re5 63.24(6) . . ?
Re4 Se3 Re6 62.98(7) . . ?
Re5 Se3 Re6 63.10(7) . . ?
Re1 Se4 Re4 62.79(6) . . ?
Re1 Se4 Re5 62.92(7) . . ?
Re4 Se4 Re5 63.21(6) . . ?
Re1 Se5 Re3 63.41(6) . . ?
Re1 Se5 Re4 63.12(6) . . ?
Re3 Se5 Re4 62.80(6) . . ?
Re3 Se6 Re4 62.82(6) . . ?
Re3 Se6 Re6 63.19(6) . . ?
Re4 Se6 Re6 63.15(6) . . ?
Re1 Se7 Re2 63.76(6) . . ?
Re1 Se7 Re3 63.52(6) . . ?
Re2 Se7 Re3 63.08(6) . . ?
Re1 Se8 Re2 63.50(5) . . ?
Re1 Se8 Re5 62.96(5) . . ?
Re2 Se8 Re5 62.93(6) . . ?
Re1 P1 C1 111.4(9) . . ?
Re1 P1 C3 112.6(12) . . ?
Re1 P1 C5 116.4(8) . . ?
C1 P1 C3 101.2(16) . . ?
C1 P1 C5 113.3(15) . . ?
C3 P1 C5 100.5(16) . . ?
Re2 P2 C7 113.6(8) . . ?
Re2 P2 C9 117.3(7) . . ?
Re2 P2 C11 115.5(7) . . ?
C7 P2 C9 104.0(10) . . ?
C7 P2 C11 101.6(10) . . ?
C9 P2 C11 102.8(11) . . ?
Re3 P3 C13 117.0(10) . . ?
Re3 P3 C15 114.0(7) . . ?
Re3 P3 C17 114.5(9) . . ?
C13 P3 C15 105.5(12) . . ?
C13 P3 C17 98.8(14) . . ?
C15 P3 C17 105.3(12) . . ?
Re4 P4 C19 114.9(10) . . ?
Re4 P4 C21 112.8(8) . . ?
Re4 P4 C23 116.1(7) . . ?
C19 P4 C21 101.4(11) . . ?
C19 P4 C23 104.9(14) . . ?
C21 P4 C23 105.4(12) . . ?
Re5 P5 C25 116.3(8) . . ?
Re5 P5 C27 111.5(8) . . ?
Re5 P5 C29 115.0(9) . . ?
C25 P5 C27 106.8(13) . . ?
C25 P5 C29 100.8(13) . . ?
C27 P5 C29 105.3(12) . . ?
P1 C1 C2 117.2(19) . . ?
P1 C3 C4 120(3) . . ?
P1 C5 C6 112(3) . . ?
P2 C7 C8 114.7(17) . . ?
P2 C9 C10 112.5(18) . . ?
P2 C11 C12 114.3(19) . . ?
P3 C13 C14 114.0(19) . . ?
P3 C15 C16 117.1(17) . . ?
P3 C17 C18 113(2) . . ?
P4 C19 C20 113.4(19) . . ?
P4 C21 C22 112.4(16) . . ?
P4 C23 C24 115.6(18) . . ?
P5 C25 C26 114(2) . . ?
P5 C27 C28 115.2(17) . . ?
P5 C29 C30 113(2) . . ?
Re6 N C31 127.8(17) . . ?
Re6 N C33 118.6(12) . . ?
C31 N C33 112.8(19) . . ?
N C31 C32 131(2) . . ?
N C33 C34 115.1(9) . . ?
N C33 C38 124.6(9) . . ?
C34 C33 C38 120.0 . . ?
C33 C34 C35 120.0 . . ?
C34 C35 C36 120.0 . . ?
C35 C36 C37 120.0 . . ?
C36 C37 C38 120.0 . . ?
C33 C38 C37 120.0 . . ?
C39 B1 C45 113.2(18) . . ?
C39 B1 C51 111.4(17) . . ?
C39 B1 C57 104.8(18) . . ?
C45 B1 C51 104.4(17) . . ?
C45 B1 C57 112.6(17) . . ?
C51 B1 C57 110.6(18) . . ?
B1 C39 C40 122.3(19) . . ?
B1 C39 C44 123.2(19) . . ?
C40 C39 C44 114.1(18) . . ?
C39 C40 C41 122(2) . . ?
C40 C41 C42 120(2) . . ?
C41 C42 C43 119(2) . . ?
C42 C43 C44 120(2) . . ?
C39 C44 C43 124(2) . . ?
B1 C45 C46 122.3(17) . . ?
B1 C45 C50 123.9(19) . . ?
C46 C45 C50 114(2) . . ?
C45 C46 C47 124(2) . . ?
C46 C47 C48 119(2) . . ?
C47 C48 C49 118(2) . . ?
C48 C49 C50 120(2) . . ?
C45 C50 C49 124(2) . . ?
B1 C51 C52 121.4(17) . . ?
B1 C51 C56 123.6(18) . . ?
C52 C51 C56 114.6(19) . . ?
C51 C52 C53 122(2) . . ?
C52 C53 C54 121(2) . . ?
C53 C54 C55 121(2) . . ?
C54 C55 C56 119(2) . . ?
C51 C56 C55 122(2) . . ?
B1 C57 C58 128(2) . . ?
B1 C57 C62 121(2) . . ?
C58 C57 C62 111(2) . . ?
C57 C58 C59 126(3) . . ?
C58 C59 C60 120(3) . . ?
C59 C60 C61 120(3) . . ?
C60 C61 C62 118(3) . . ?
C57 C62 C61 125(3) . . ?
C63 B2 C69 113(2) . . ?
C63 B2 C75 113(2) . . ?
C63 B2 C81 104.1(18) . . ?
C69 B2 C75 105(2) . . ?
C69 B2 C81 107(2) . . ?
C75 B2 C81 113.8(19) . . ?
B2 C63 C64 122(2) . . ?
B2 C63 C68 123(2) . . ?
C64 C63 C68 115(2) . . ?
C63 C64 C65 123(3) . . ?
C64 C65 C66 120(3) . . ?
C65 C66 C67 121(3) . . ?
C66 C67 C68 117(3) . . ?
C63 C68 C67 123(3) . . ?
B2 C69 C70 123(2) . . ?
B2 C69 C74 123(2) . . ?
C70 C69 C74 113(2) . . ?
C69 C70 C71 127(3) . . ?
C70 C71 C72 115(3) . . ?
C71 C72 C73 122(3) . . ?
C72 C73 C74 121(3) . . ?
C69 C74 C73 123(3) . . ?
B2 C75 C76 121(2) . . ?
B2 C75 C80 124(2) . . ?
C76 C75 C80 114(2) . . ?
C75 C76 C77 123(2) . . ?
C76 C77 C78 121(2) . . ?
C77 C78 C79 118(2) . . ?
C78 C79 C80 121(2) . . ?
C75 C80 C79 122(2) . . ?
B2 C81 C82 120(2) . . ?
B2 C81 C86 125(2) . . ?
C82 C81 C86 114(2) . . ?
C81 C82 C83 123(2) . . ?
C82 C83 C84 120(2) . . ?
C83 C84 C85 118(2) . . ?
C84 C85 C86 123(2) . . ?
C81 C86 C85 123(2) . . ?
C88 C87 C92 120.0 . . ?
C87 C88 C89 120.0 . . ?
C88 C89 C90 120.0 . . ?
C89 C90 C91 120.0 . . ?
C90 C91 C92 120.0 . . ?
C87 C92 C91 120.0 . . ?
C87 C92 C93 129.0 . . ?
C91 C92 C93 111.0 . . ?

_diffrn_measured_fraction_theta_max    0.984
_diffrn_reflns_theta_full              25.72
_diffrn_measured_fraction_theta_full   0.984
_refine_diff_density_max    5.421
_refine_diff_density_min   -3.198
_refine_diff_density_rms    0.303

_vrf_PLAT213_Complex3
;
PROBLEM: Atom N               has ADP max/min Ratio .....       6.60 prola
RESPONSE: This and other associated structure quality 
alerts are the result of large residual electron density peaks close
to metal centres for which we could find no chemically reasonable model.
;
